# Supplementary material for: Rapid microwave-assisted synthesis of high-rate FeS2 nanoparticles anchored on graphene for hybrid supercapacitors with ultrahigh energy density
Source: Royal Society of Chemistry journal article supplement (doi:10.1039/c8ta05818k), 2018-01-01
Supplement: c8ta05818k1.pdf [file c8ta05818k1.pdf]

## Supporting Information

### **Rapid microwave-assisted synthesis of high-rate FeS<sub>2</sub> nanoparticles anchored on graphene for hybrid supercapacitors with ultrahigh energy density**

Zhiqin Sun, Huiming Lin, Feng Zhang, Xue Yang, He Jiang, Qian Wang\*, Fengyu Qu\*

*Key Laboratory of Photochemical Biomaterials and Energy Storage Materials,*

*Heilongjiang Province, College of Chemistry and Chemical Engineering,*

*Harbin Normal University, Harbin 150025, China*

## **1. Experimental**

### **1.1. Materials**

Cobalt chloride hexahydrate (CoCl<sub>2</sub>·6H<sub>2</sub>O, AR), urea (CO(NH<sub>2</sub>)<sub>2</sub>, AR), potassium hydroxide (KOH, AR), nickel nitrate hexahydrate (Ni(NO<sub>3</sub>)<sub>2</sub>·6H<sub>2</sub>O, AR), ferrous sulfate (FeSO<sub>4</sub>·7H<sub>2</sub>O, AR), sodium thiosulfate pentahydrate (Na<sub>2</sub>S<sub>2</sub>O<sub>3</sub>·5H<sub>2</sub>O, AR), sodium polyacrylate (PAAS), sulfuric acid (H<sub>2</sub>SO<sub>4</sub>, 98 wt.%), potassium permanganate (KMnO<sub>4</sub>, AR), hydrogen peroxide (H<sub>2</sub>O<sub>2</sub>) were purchased from Sinopharm Chemical Reagent Co. Ltd. Sodium sulfide nonahydrate (Na<sub>2</sub>S·9H<sub>2</sub>O, 99.99 wt.%) was obtained from Aladdin (Shanghai).

### **1.2. Synthesis of FeS<sub>2</sub>/GNS composite**

Graphene oxide (GO) was prepared through modified Hummers method as reported before.<sup>1</sup> FeS<sub>2</sub>/GNS composite was synthesized by using ultra-fast microwave-assisted hydrothermal method. In brief, 30 mL of the GO solution (0.16 mg mL<sup>-1</sup>) was subject to ultrasonic vibration for 20 min. Then 0.25 mmol of FeSO<sub>4</sub>·7H<sub>2</sub>O and 0.5

---

\*Corresponding authors.

E-mail addresses: wangqianhrb@163.com (Q.Wang); qufengyuhsd@163.com (F.Y.Qu).

mmol of  $\text{Na}_2\text{S}_2\text{O}_3 \cdot 5\text{H}_2\text{O}$  was added into the above solution and stirred for another 20 min. Subsequently, the as-prepared solution was transferred into a microwave reactor and heated at  $180\text{ }^\circ\text{C}$  with a power of 300 W for 5 min. Finally, the sample was centrifuged and washed using ultrapure water for several times and dried in an oven at  $80\text{ }^\circ\text{C}$  for 12 h. Pure  $\text{FeS}_2$  was also synthesized without the use of GNS. For the control experiment,  $\text{FeS}_2/\text{GNS-1}$  and  $\text{FeS}_2/\text{GNS-2}$  composites had been also prepared by the similar hydrothermal route with 0.16 mmol of  $\text{FeSO}_4 \cdot 7\text{H}_2\text{O}$ , 0.32 mmol of  $\text{Na}_2\text{S}_2\text{O}_3 \cdot 5\text{H}_2\text{O}$  and 0.42 mmol of  $\text{FeSO}_4 \cdot 7\text{H}_2\text{O}$ , 0.84 mmol of  $\text{Na}_2\text{S}_2\text{O}_3 \cdot 5\text{H}_2\text{O}$ , respectively.

### ***1.3. Synthesis of $\text{Ni}(\text{OH})_2@ \text{Co}_9\text{S}_8$ composite***

In a typical synthesis of  $\text{Co}(\text{CO}_3)_{0.35}\text{Cl}_{0.20}(\text{OH})_{1.10}$  precursor,  $\text{CoCl}_2 \cdot 6\text{H}_2\text{O}$  (2.5 mmol) and urea (2.5 mmol) were dissolved in 40 mL of deionized water under stirring and transferred into a 50 mL Teflon-lined stainless steel autoclave, which was maintained at  $100\text{ }^\circ\text{C}$  for 2 h. The pink precipitate was washed with deionized water and dried at  $80\text{ }^\circ\text{C}$ . Afterwards, 1 mmol of as-prepared precursor was dispersed in 40 mL of deionized water, and then, 3 mmol  $\text{Na}_2\text{S} \cdot 9\text{H}_2\text{O}$  was added into the dispersion. After magnetic stirring for 1 h, the dispersion was transferred into a 50 mL Teflon-lined stainless steel autoclave at  $160\text{ }^\circ\text{C}$  for 12 h. Finally, the black product was centrifuged and washed by deionized water and the  $\text{Co}_9\text{S}_8$  nanotube was synthesized.

$\text{Ni}(\text{OH})_2@ \text{Co}_9\text{S}_8$  composite was typically prepared as follows: the mixture contained 30 mL of  $\text{Co}_9\text{S}_8$  nanotube dispersion ( $1\text{ mg mL}^{-1}$ ) and 1 M  $\text{Ni}(\text{NO}_3)_2$  was stirred for a few minutes, and then the pH of the whole dispersion was adjusted to 9 with ammonia (5 wt.%). Finally, the precipitate was washed and dried in a vacuum oven at  $80\text{ }^\circ\text{C}$  for 12 h. Pure  $\text{Ni}(\text{OH})_2$  was also prepared for comparison under the same

procedure without the addition of Co<sub>9</sub>S<sub>8</sub> nanotube.

#### ***1.4. Characterization***

X-ray diffraction (XRD) equipped with CuK $\alpha$  radiation ( $\lambda = 0.15406$  nm) was used to characterize the crystallographic structures of all materials. Scanning electron microscope (SEM, Hitachi S-4800) and transmission electron microscope (TEM, Tecnai F20) were conducted to characterize the micromorphology. X-ray photoelectron spectroscopy (XPS, PHI 5000 ESCA) was carried out to investigate the valence state and composition of materials. Raman spectra of the products were characterized by Micro-Raman spectrometer (J-Y; HR800, France) under excitation wavelength of 488 nm. Thermogravimetric analysis (TGA) was used to calculate the content of graphene nanosheets in the composites. Nitrogen adsorption-desorption isotherms were measured at 77 K on a Quantachrome NOVA-3000 system.

#### ***1.5. Electrochemical measurements***

The working electrodes were prepared as follows: First, the electroactive materials, carbon black and poly (tetrafluoroethylene) were mixed in a mass ratio of 75:20:5 and dispersed in ethanol. Then the resulting mixture was coated onto the nickel foam substrate ( $1 \times 1$  cm<sup>2</sup>), which was followed by drying at 60 °C for 12 h in an oven. The as-prepared materials (mass loading:  $\sim 3$  mg cm<sup>-2</sup>) was used as working electrode with 2 M KOH solution as electrolyte. A three-electrode system was used to investigate the electrochemical performances of the individual electrodes. A platinum foil (1 cm<sup>2</sup>) and Hg/HgO were used as the counter and the reference electrodes, respectively. Cyclic voltammetry (CV) and chronopotentiometry were performed on a CHI660E within -1.1 to 0 V and the electrochemical impedance (EIS) were carried out in the frequency range

from 100 kHz to 0.01 Hz at open circuit potential with an AC amplitude of 5 mV. The specific capacity of the anode and cathode could be calculated based on the galvanostatic charge/discharge curves by the following equation:

$$C_m = I\Delta t / m\Delta V \quad (\text{S1})$$

where  $C_m$ ,  $I$ ,  $m$ ,  $\Delta t$  and  $\Delta V$  are the specific capacity, current, mass, discharge time and potential range of the active material.

### ***1.6. Fabrication of hybrid supercapacitor device***

PAAS-KOH gel electrolyte was prepared as follows: 2.5 g PAAS was dissolved in 30 mL of 2 M KOH aqueous solution and stirred until the solution became homogeneous and clear. FeS<sub>2</sub>/GNS and Ni(OH)<sub>2</sub>@Co<sub>9</sub>S<sub>8</sub> electrodes, served as the anode and cathode, respectively, were coated with the gel electrolyte and separated with a piece of cellulose paper to fabricated all-solid-state hybrid supercapacitor. The mass balance of the anode and cathode should obey the relationships as follows:

$$q_+ = q_- \quad (\text{S2})$$

$$q = CVm \quad (\text{S3})$$

where  $q$  is the stored charge,  $C$  is the specific capacity,  $V$  is the potential range and the  $m$  is the mass of the active material.

Specific energy and power density of the hybrid supercapacitor device were calculated based on the following equations:

$$E = \int IVdt \quad (\text{S4})$$

$$P = \frac{E}{t} \quad (\text{S5})$$

where  $E$ ,  $I$ ,  $V$ ,  $t$  and  $m$  is the energy density, current, voltage, discharge time and mass of the active materials of two electrodes.

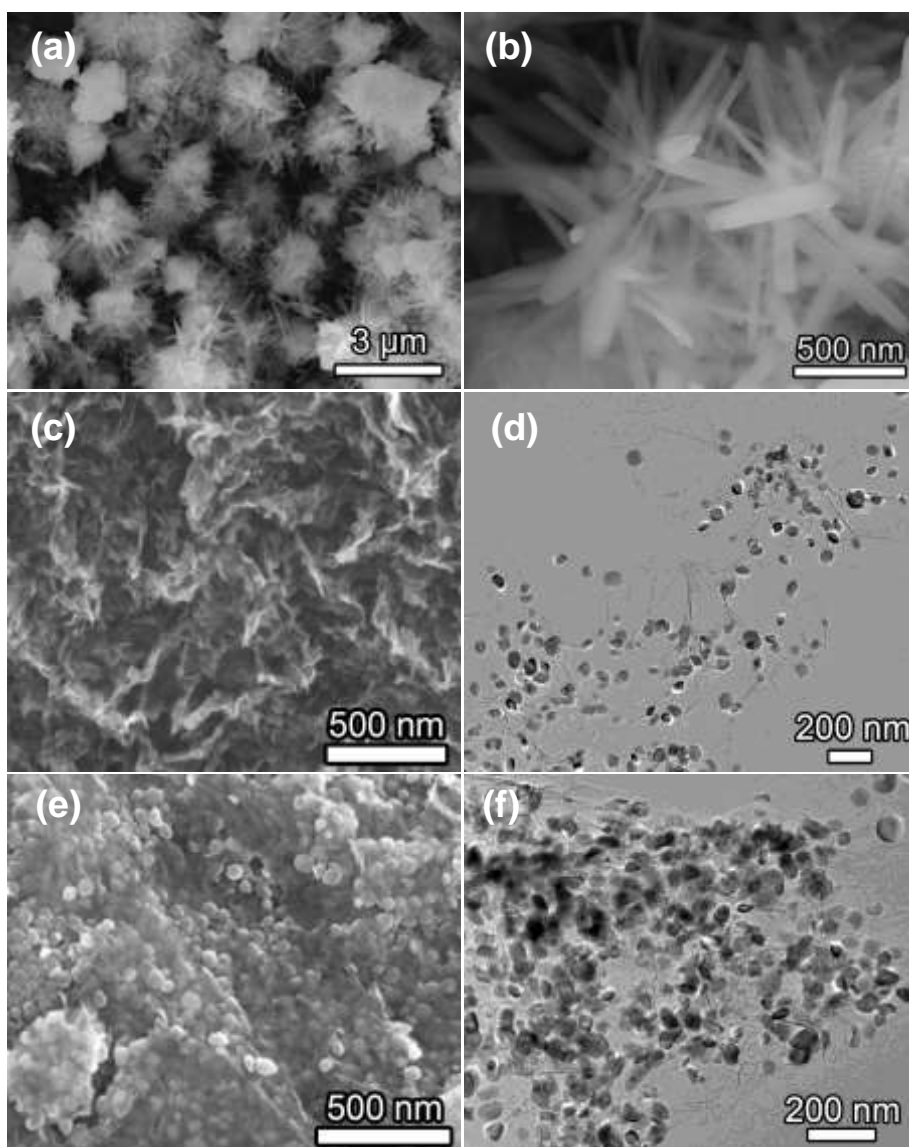

**Fig. S1** (a, b) SEM images of pure FeS<sub>2</sub>. (c) SEM and (d) TEM images of FeS<sub>2</sub>/GNS-1, (e) SEM and (f) TEM images of FeS<sub>2</sub>/GNS-2.

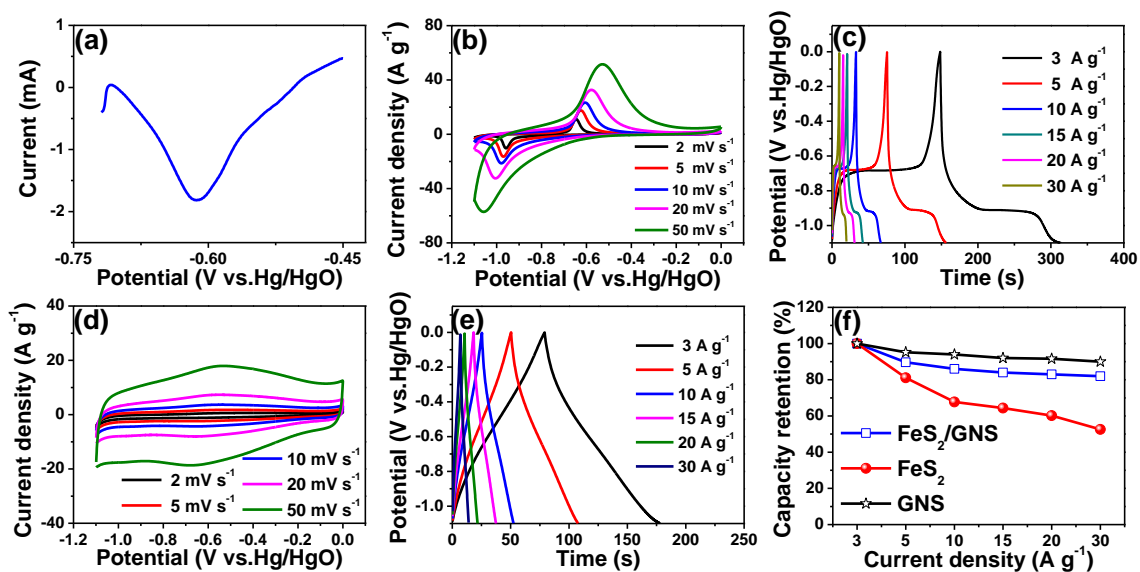

**Fig. S2** (a) SWV curve of FeS<sub>2</sub>/GNS electrode. (b) CV curves at different scan rates and (c) galvanostatic charge-discharge curves at various current densities of pure FeS<sub>2</sub> electrode. (d) CV curves at different scan rates and (e) galvanostatic charge-discharge curves at various current densities of GNS electrode. (f) Rate capability of pure FeS<sub>2</sub>, GNS and FeS<sub>2</sub>/GNS electrodes.

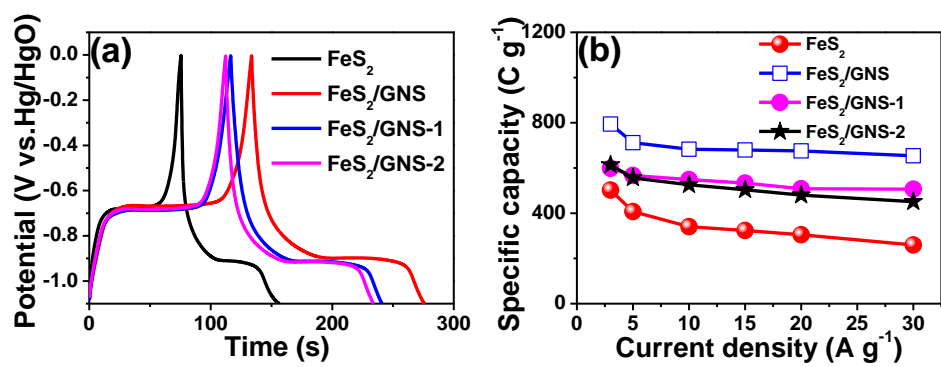

**Fig. S3** (a) Galvanostatic charge/discharge curves of pure FeS<sub>2</sub>, FeS<sub>2</sub>/GNS, FeS<sub>2</sub>/GNS-1 and FeS<sub>2</sub>/GNS-2 electrodes at 5 A g<sup>-1</sup> and (b) specific capacity of all the electrodes at various current densities.

**Table S1** Integration of specific capacitance and rate capabilities of various electrodes reported previously based on Fe-based anode materials.

| Electrode materials                                        | Electrolyte                         | Potential range    | Capacitance<br>(F g <sup>-1</sup> )       | Capacitance<br>retention                   | Ref.                 |
|------------------------------------------------------------|-------------------------------------|--------------------|-------------------------------------------|--------------------------------------------|----------------------|
| Fe <sub>3</sub> O <sub>4</sub> /carbon nanosheets          | 6 M KOH                             | -1.1 to -0.2 V     | 586<br>(0.5 A g <sup>-1</sup> )           | 58%<br>(10 A g <sup>-1</sup> )             | 2                    |
| 3D Fe <sub>3</sub> O <sub>4</sub> /rGO                     | 2 M KOH                             | -1.0 to 0.4 V      | 455<br>(8 mV s <sup>-1</sup> )            | 70%<br>(27 mV s <sup>-1</sup> )            | 3                    |
| Fe <sub>2</sub> O <sub>3</sub> @Nickel nanotube            | 1 M Na <sub>2</sub> SO <sub>4</sub> | -0.8 to 0 V        | 418.7<br>(10 mV s <sup>-1</sup> )         | 42%<br>(200 mV s <sup>-1</sup> )           | 4                    |
| FeOOH<br>nanorods/graphene                                 | 1 M LiOH                            | -1.15 to 0.1 V     | 326<br>(0.5 A g <sup>-1</sup> )           | 90%<br>(10 A g <sup>-1</sup> )             | 5                    |
| Fe <sub>3</sub> O <sub>4</sub> particles/graphene          | 1 M KOH                             | -1 to 0.1 V        | 220.1<br>(0.5 A g <sup>-1</sup> )         | 61%<br>(5 A g <sup>-1</sup> )              | 6                    |
| Fe <sub>2</sub> O <sub>3</sub> particles/graphene          | 1 M KOH                             | -1.05 to -0.3 V    | 908<br>(2 A g <sup>-1</sup> )             | 68.8%<br>(50 A g <sup>-1</sup> )           | 7                    |
| $\alpha$ -Fe <sub>2</sub> O <sub>3</sub> @MnO <sub>2</sub> | 3 M KOH                             | -0.4 to 0.5 V      | 289<br>(1 A g <sup>-1</sup> )             | 40%<br>(5 A g <sup>-1</sup> )              | 8                    |
| <b>FeS<sub>2</sub>/GNS</b>                                 | <b>2 M KOH</b>                      | <b>-1.1 to 0 V</b> | <b>721</b><br><b>(3 A g<sup>-1</sup>)</b> | <b>82%</b><br><b>(30 A g<sup>-1</sup>)</b> | <b>This<br/>work</b> |



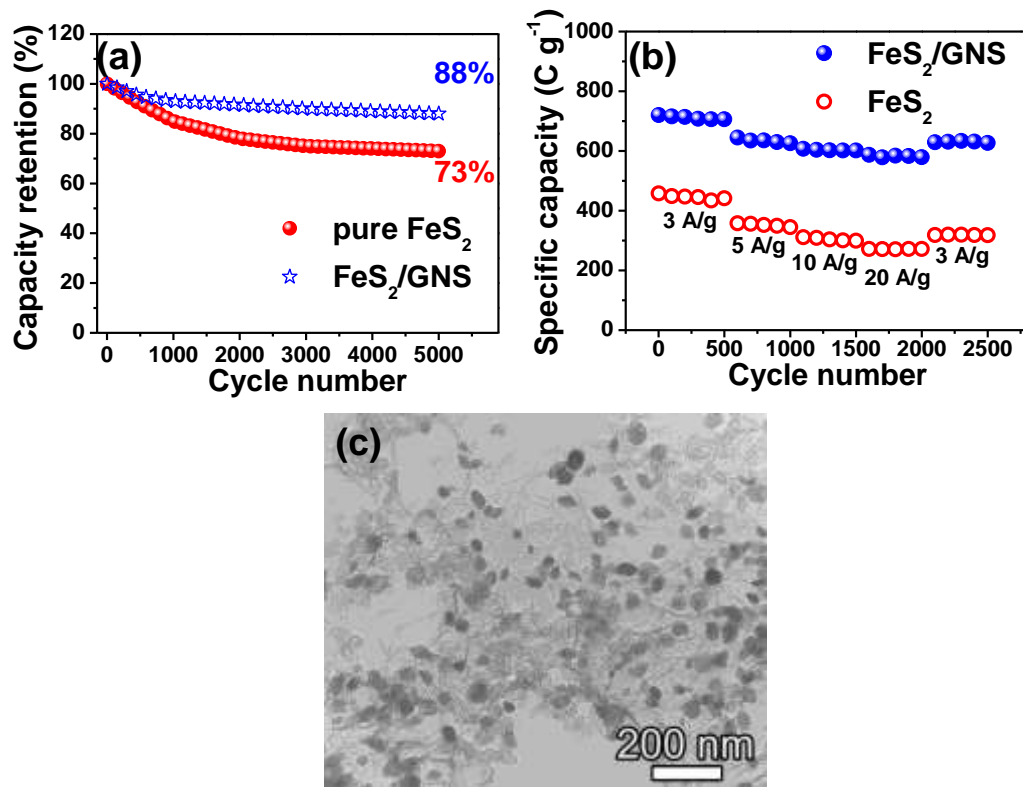

**Fig. S4** (a) Cycling performance of pure FeS<sub>2</sub> and FeS<sub>2</sub>/GNS electrodes measured at 20 A g<sup>-1</sup> for 5000 cycles. (b) Cycling graph of pure FeS<sub>2</sub> and FeS<sub>2</sub>/GNS electrodes at different current densities. (c) TEM image of FeS<sub>2</sub>/GNS electrode after cycling test for 2500 cycles.

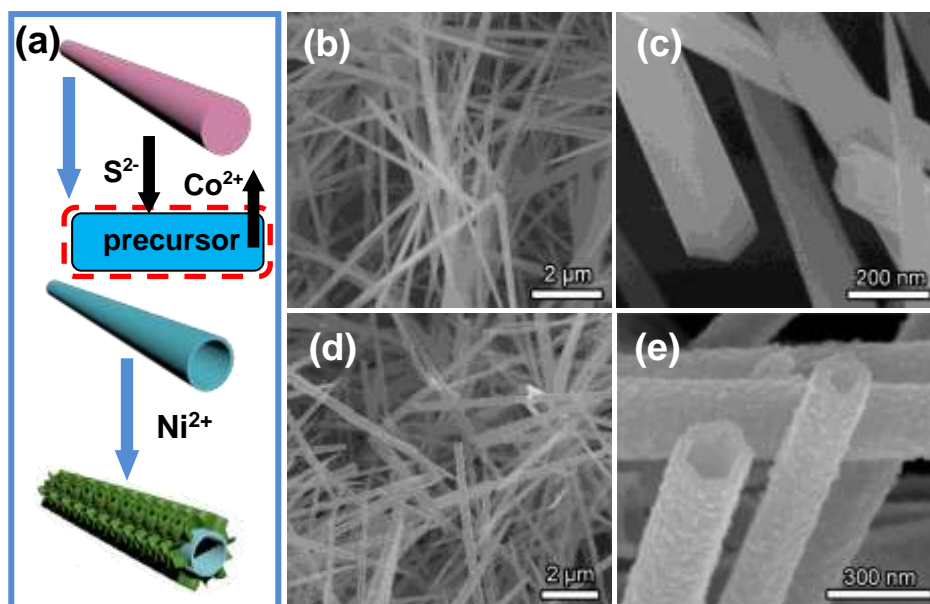

**Fig. S5** (a) Schematic illustration of the synthesis process of hierarchical  $Ni(OH)_2@Co_9S_8$  composite. SEM images of (b, c) precursor and (d, e)  $Co_9S_8$ .

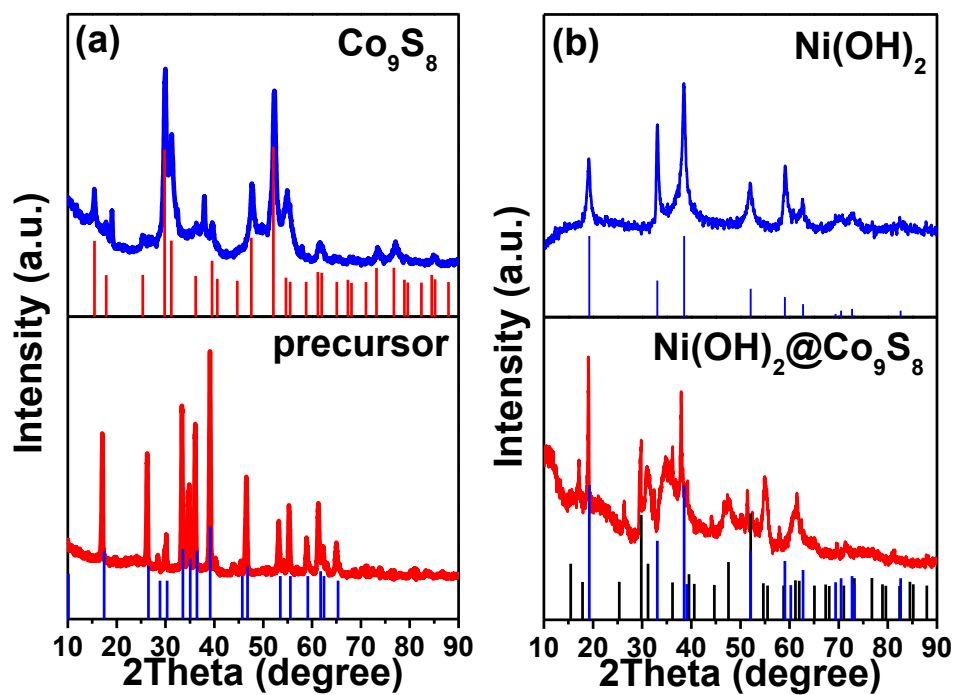

**Fig. S6** XRD patterns of (a)  $\text{Co}_9\text{S}_8$  and precursor, (b)  $\text{Ni(OH)}_2$  and  $\text{Ni(OH)}_2@Co_9S_8$  composite.

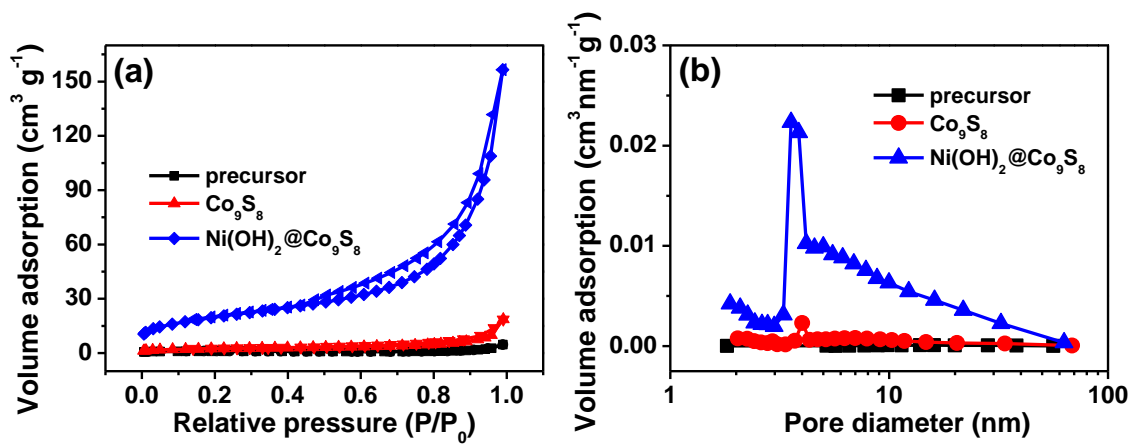

**Fig. S7** (a)  $\text{N}_2$  adsorption-desorption isotherms and (b) pore size distribution of the precursor,  $\text{Co}_9\text{S}_8$  and  $\text{Ni}(\text{OH})_2@ \text{Co}_9\text{S}_8$  composite.

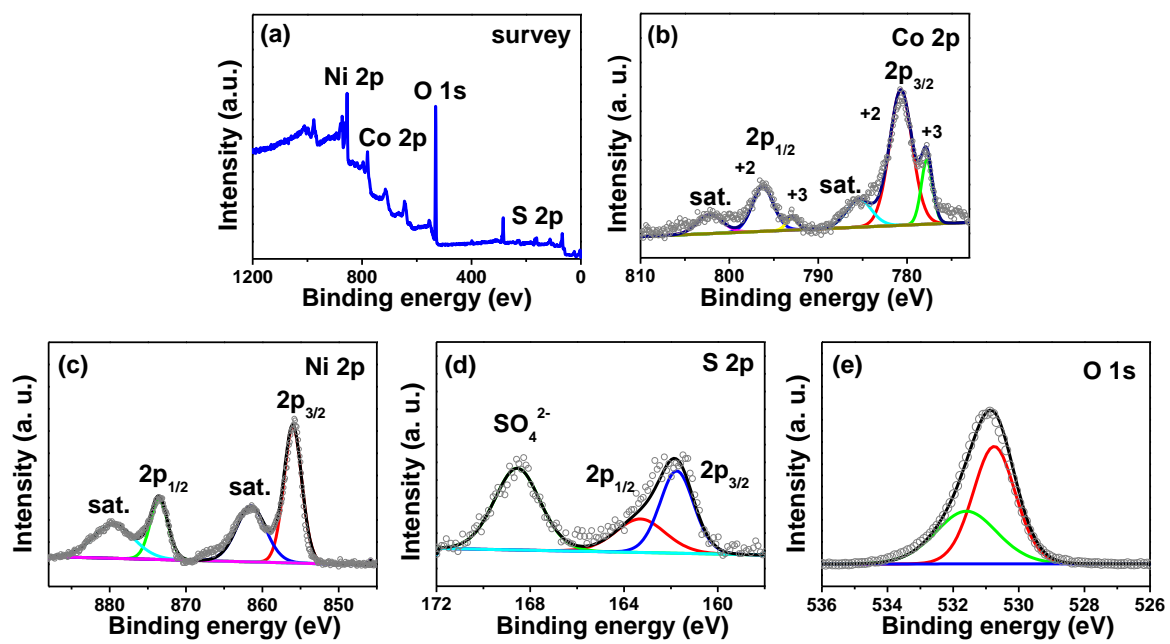

**Fig. S8** XPS spectra of (a) survey, (b) Co 2p, (c) Ni 2p, (d) S 2p and (e) O 1s.

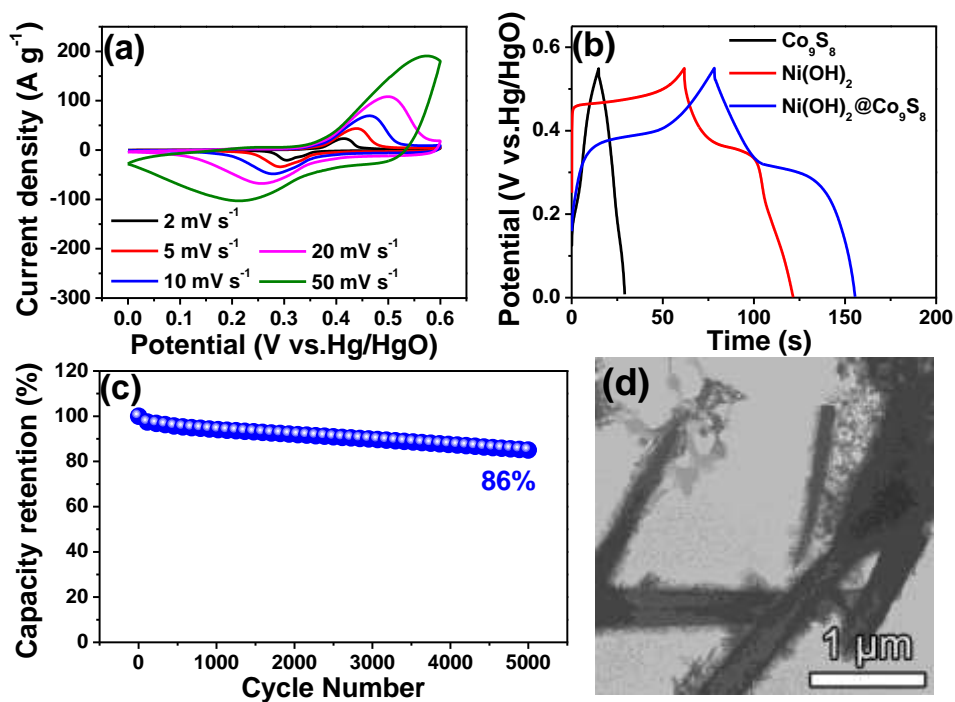

**Fig. S9** (a) CV curves of Ni(OH)<sub>2</sub>@Co<sub>9</sub>S<sub>8</sub> electrode at various scan rates. (b) Galvanostatic charge-discharge curves of Co<sub>9</sub>S<sub>8</sub>, Ni(OH)<sub>2</sub> and Ni(OH)<sub>2</sub>@Co<sub>9</sub>S<sub>8</sub> electrodes at the same current density of 10 A g<sup>-1</sup>. (c) Cycling performance of the Ni(OH)<sub>2</sub>@Co<sub>9</sub>S<sub>8</sub> electrode measured at 20 A g<sup>-1</sup> for 5000 cycles. (d) TEM image of Ni(OH)<sub>2</sub>@Co<sub>9</sub>S<sub>8</sub> electrode after cycling test for 5000 cycles .

**Table S2** Integration of electrochemical performance of various ASC and hybrid supercapacitor devices based on Fe-based anode materials reported recently.

| Hybrid supercapacitor device                                                                 | Electrolyte                                                           | Voltage (V) | Energy density (Wh kg <sup>-1</sup> ) | Power density (kW kg <sup>-1</sup> ) | Ref.             |
|----------------------------------------------------------------------------------------------|-----------------------------------------------------------------------|-------------|---------------------------------------|--------------------------------------|------------------|
| <b>CoMoO<sub>4</sub>@NiMoO<sub>4</sub>·xH<sub>2</sub>O//Fe<sub>2</sub>O<sub>3</sub></b>      | KOH-PVA                                                               | 1.6         | 41.8                                  | 0.7                                  | 9                |
| <b>MnO<sub>2</sub>//Fe<sub>2</sub>O<sub>3</sub></b>                                          | LiClO <sub>4</sub> -PVA                                               | 2.0         | 41                                    | 2.1                                  | 10               |
| <b>MWCNTs/MnO<sub>2</sub>//Fe<sub>2</sub>O<sub>3</sub></b>                                   | K <sub>3</sub> [Fe(CN) <sub>6</sub> ]-Na <sub>2</sub> SO <sub>4</sub> | 2.0         | 54.39                                 | 0.667                                | 11               |
| <b>FeOOH//Co-Ni double hydroxides</b>                                                        | KOH-PVA                                                               | 1.6         | 86.4                                  | 11.6                                 | 12               |
| <b>NiOOH/Ni<sub>3</sub>S<sub>2</sub>/3D graphene//Fe<sub>3</sub>O<sub>4</sub>/graphene</b>   | KOH-PVA                                                               | 1.6         | 82.5                                  | 0.93                                 | 13               |
| <b>Co-Fe<sub>3</sub>O<sub>4</sub>NS@NG//CoMnO<sub>3</sub>NG</b>                              | 3 M KOH                                                               | 1.8         | 89.1                                  | 0.901                                | 14               |
| <b>MnO<sub>2</sub>/CC//γ-FeOOH/CC</b>                                                        | 1 M Li <sub>2</sub> SO <sub>4</sub>                                   | 1.8         | 37.4                                  | 16                                   | 15               |
| <b>NiMoO<sub>4</sub>//FeOOH</b>                                                              | 2 M KOH                                                               | 1.7         | 104                                   | 1.27                                 | 16               |
| <b>GF-CNT@Fe<sub>2</sub>O<sub>3</sub>//GF-CoMoO<sub>4</sub></b>                              | 2 M KOH                                                               | 1.6         | 74.7                                  | 1.4                                  | 17               |
| <b>NiCo<sub>2</sub>O<sub>4</sub>/NiO//Fe<sub>2</sub>O<sub>3</sub></b>                        | 1 M KOH                                                               | 1.6         | 19                                    | 0.157                                | 18               |
| <b>SiC@NiCo<sub>2</sub>O<sub>4</sub>/Ni(OH)<sub>2</sub>//SiC@Fe<sub>2</sub>O<sub>3</sub></b> | 2 M KOH                                                               | 1.8         | 45                                    | 26.1                                 | 19               |
| <b>NiO//α-Fe<sub>2</sub>O<sub>3</sub></b>                                                    | 1 M KOH                                                               | 1.25        | 12.4                                  | 0.951                                | 20               |
| <b>FeS<sub>2</sub>/GNS//Ni(OH)<sub>2</sub>@Co<sub>9</sub>S<sub>8</sub></b>                   | <b>PAAS-KOH</b>                                                       | <b>1.7</b>  | <b>95.8</b>                           | <b>0.949</b>                         | <b>This work</b> |

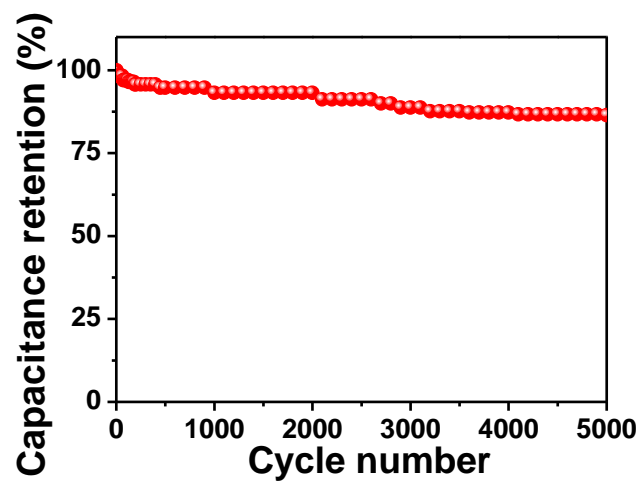

**Fig. S10** Cycling performance of the hybrid supercapacitor device measured at  $15 \text{ A g}^{-1}$

<sup>1</sup> for 5000 cycles.



## Reference

1. J. Chen, Y. Li, L. Huang, C. Li and G. Shi, *Carbon*, 2015, **81**, 826-834.
2. H. Fan, R. Niu, J. Duan, W. Liu and W. Shen, *ACS Appl. Mater. Interfaces*, 2016, **8**, 19475-19483.
3. R. Kumar, R. K. Singh, A. R. Vaz, R. Savu and S. A. Moshkalev, *ACS Appl. Mater. Interfaces*, 2017, **9**, 8880-8890.
4. Y. Li, J. Xu, T. Feng, Q. Yao, J. Xie and H. Xia, *Adv. Funct. Mater.*, 2017, **27**, 1606728.
5. L.-F. Chen, Z.-Y. Yu, J.-J. Wang, Q.-X. Li, Z.-Q. Tan, Y.-W. Zhu and S.-H. Yu, *Nano Energy*, 2015, **11**, 119-128.
6. Q. Wang, L. Jiao, H. Du, Y. Wang and H. Yuan, *J. Power Sources*, 2014, **245**, 101-106.
7. H. Wang, Z. Xu, H. Yi, H. Wei, Z. Guo and X. Wang, *Nano Energy*, 2014, **7**, 86-96.
8. G. Nie, X. Lu, M. Chi, Y. Zhu, Z. Yang, N. Song and C. Wang, *Electrochim. Acta*, 2017, **231**, 36-43.
9. J. Wang, L. Zhang, X. Liu, X. Zhang, Y. Tian, X. Liu, J. Zhao and Y. Li, *Sci. Rep.*, 2017, **7**, 41088.
10. N. R. Chodankar, D. P. Dubal, G. S. Gund and C. D. Lokhande, *Energy Tech.*, 2015, **3**, 625-631.
11. N. R. Chodankar, D. P. Dubal, A. C. Lokhande, A. M. Patil, J. H. Kim and C. D. Lokhande, *Sci. Rep.*, 2016, **6**, 39205.
12. J. Chen, J. Xu, S. Zhou, N. Zhao and C.-P. Wong, *Nano Energy*, 2016, **21**, 145-153.
13. T. W. Lin, C. S. Dai and K. C. Hung, *Sci. Rep.*, 2014, **4**, 7274.
14. M. Guo, J. Balamurugan, X. Li, N. H. Kim and J. H. Lee, *Small*, 2017, **13**.
15. Y. C. Chen, Y. G. Lin, Y. K. Hsu, S. C. Yen, K. H. Chen and L. C. Chen, *Small*, 2014, **10**, 3803-3810.
16. K. A. Owusu, L. Qu, J. Li, Z. Wang, K. Zhao, C. Yang, K. M. Hercule, C. Lin, C. Shi, Q. Wei, L. Zhou and L. Mai, *Nat. Commun.*, 2017, **8**, 14264.
17. C. Guan, J. Liu, Y. Wang, L. Mao, Z. Fan, Z. Shen, H. Zhang and J. Wang, *ACS Nano*, 2015, 5198-5207.
18. A. Shanmugavani and R. K. Selvan, *Electrochim. Acta*, 2016, **189**, 283-294.
19. J. Zhao, Z. Li, X. Yuan, Z. Yang, M. Zhang, A. Meng and Q. Li, *Adv. Energy Mater.*, 2018, 1702787.
20. S. Zhang, B. Yin, Z. Wang and F. Peter, *Chem. Eng. J.*, 2016, **306**, 193-203.
